# Supplementary material for: Global Spatial Variation in the PM 2.5 to AOD Relationship Strongly Influenced by Aerosol Composition
Source: Copernicus journal article supplement (doi:10.5194/egusphere-2024-950), 2024-04-05
Supplement: Supplementary file [file egusphere-2024-950-AC2-supplement.pdf]

**The first uploaded version of the Author Comments was incorrect. Please use this version.**

**Reviewer 1:**

**general overview:**

The manuscript (egusphere-2024-950) entitled “Global Spatial Variation in the PM<sub>2.5</sub> to AOD Relationship Strongly Influenced by Aerosol Composition” presented an attractive aspect of the relation between PM<sub>2.5</sub> and AOD. Under the consideration of such relationships, as the manuscript title itself declared, PM<sub>2.5</sub> composition is quite an important point. However, the current presentation severely lacked the description and validation of them. Without the clarification of these points, I do not go through to further discussion points. Please address the following comments before the possible publication from the journal of ACP.

We appreciate the affirmation of the importance of this work and the valuable suggestions. We revised the manuscript to incorporate additional datasets, more descriptions of our methods, and further discussion of the results. To address reviewer 1’s major concern, an additional figure (Figure A2) comparing GCHP simulated surface PM<sub>2.5</sub> chemical composition to ground measurements, is included in the Appendix. Please find our detailed response in blue to each comment below.

**critical concerns:**

From Section 2.4, we can follow the description of PM<sub>2.5</sub> components. However, for example, “A 50% reduction of the surface nitrate concentration is applied to account for the long persisting bias in surface nitrate simulated by GEOS-Chem” was quite an unusual treatment considering the modeling results. In addition, “We artificially increase simulated AOD by 0.04 globally to address a poorly understood systematic bias.” also seems to be a trick. Despite such unusual post-analysis for PM<sub>2.5</sub> components, we can only find the modeling evaluation for  $\eta$ , PM<sub>2.5</sub>, and AOD. It is desired to present the modeling evaluation for PM<sub>2.5</sub> components such as SNA, black carbon, organic matter, sea salt, and dust. Without the detailed information for them, the result and discussion based on Fig. 3 cannot be understood.

To evaluate the model’s performance in representing global scale PM<sub>2.5</sub> composition simulation, we collected publicly available PM<sub>2.5</sub> compositional data from USEPA (306 sites), EU Environmental Protection Agency (37 sites), and the Surface PARTiculate mAtter Network (SPARTAN; 22 sites). We added a paragraph in section 2.1, lines 108-112, to clarify the source and coverage of PM<sub>2.5</sub> compositional data: “We also collected publicly available PM<sub>2.5</sub> compositional data to assess GCHP simulated composition. Long-term PM<sub>2.5</sub> compositional data are included from the United States Environmental Protection Agency’s Air Quality System, the European Environment Agency Air Quality e-Reporting system, and SPARTAN, with a total of 365 sites covering the U.S. (306), Europe (37), and the Global South (22).”

Our adjustment of 50% reduction in nitrate significantly mitigates the normalized mean bias (NMB) between simulated and ground measured nitrate, when compared an out-of-box simulation. Here are our results added to the Appendix: “

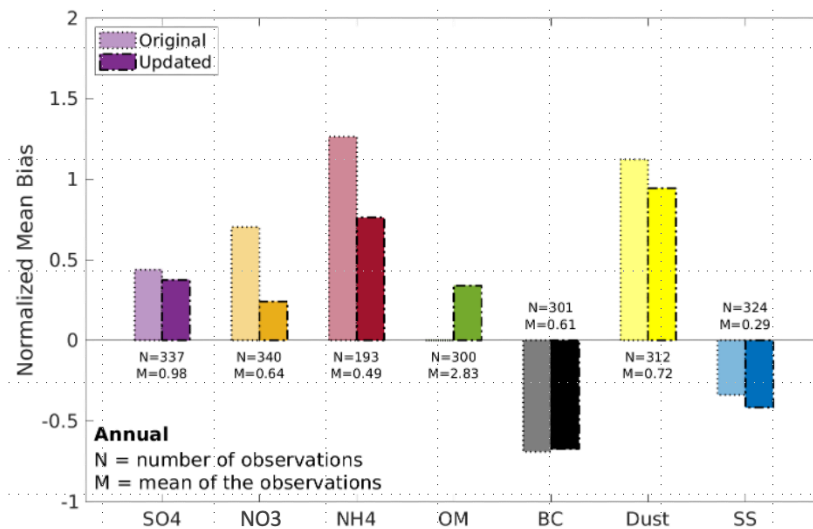

Figure A2. Normalized mean bias (NMB) between simulated PM<sub>2.5</sub> chemical composition and ground measurements from CSN, IMPROVE, EBAS, and SPARTAN. The original simulation is the out-of-box version of GCHP v13.4.0, the updated simulation includes adjustments such as GFED4.1s emission at daily scale, diel variation and vertical distribution of anthropogenic emissions, and 50% reduction in nitrate concentration.”

In response to the concern about nitrate reduction, we note that GEOS-Chem has been widely used for high-quality studies on PM<sub>2.5</sub> composition at global (McDuffie et al., 2021; Weagle et al., 2018) and regional (Geng et al., 2017; Kim et al., 2015; Philip et al., 2014; Zhai et al., 2021) scales. Even though there is a systematic high bias in nitrate, as in other models such as CMAQ (Shimadera et al., 2014), WRF-Chem (Sha et al., 2019), and EMEP/MSC-W (Prank et al., 2016), the simulations exhibit skill in representing nitrate. For example, Geng *et al.* (2017) found that the nitrate fraction from GEOS-Chem was useful to produce a nitrate PM<sub>2.5</sub> product. In another study, Zhai *et al.* (2021) show that GEOS-Chem well captures the vertical variability of all PM<sub>2.5</sub> composition during KORUS-AQ campaign (Figure 1 in Zhai *et al.* 2021).

Therefore we revised line 154 to 161 to clarify the bias and its impact on our analysis: “A 50% reduction of the surface nitrate concentration is applied to account for the long-standing bias in surface nitrate simulated by GEOS-Chem (Heald et al., 2012; Miao et al., 2020; Travis et al., 2022; Zhai et al., 2021; Zhang et al., 2012; also Figure A2 in this manuscript) and other models such as CMAQ (Shimadera et al., 2014), WRF-Chem (Sha et al., 2019), and EMEP/MSC-W (Prank et al., 2016). Despite this bias, GEOS-Chem can sufficiently represent the variability of nitrate for applications to studies at global (McDuffie et al., 2021; Weagle et al., 2018) and regional (Geng et al., 2017; Kim et al., 2015; Philip et al., 2014a; Zhai et al., 2021) scales.”

In section 2.4, lines 167 – 174, we added the rationale behind the minor change in AOD, “These updates enable GEOS-Chem to capture 74% of the AOD spatial variability versus AERONET (Zhu et al., 2023). A slight systematic low bias against MAIAC AOD is found, with an intercept of -0.05 and a population-weighted mean difference (PWMD) of -0.04. Low bias in simulated AOD is also reported for other models, such as CMAQ (Jin et al., 2019) and WRF-Chem (Benavente et al., 2023). We artificially increase simulated AOD by 0.04 globally to address this

poorly understood systematic bias that, although minor, is useful for the representation of  $\eta$  (PWMD reduced from 20.6  $\mu\text{g}/\text{m}^3$  to 1.9  $\mu\text{g}/\text{m}^3$ ).

**specific comments:**

- Line 14 and Line 46: Under the context of the abstract, the meaning of  $\eta$  is not clear. In addition, the meaning of  $\eta$  is not clear even in the main text. How about defining  $\eta$  with a mathematical formula? Although a clear definition could be followed from the authors' previous studies, this manuscript should be standalone.

To make the definition clearer, we make the following changes:

In the Abstract, on line 14 - "This study aims to understand the spatial pattern and driving factors of the relationship by examining simulated  $\eta$  ( $= \frac{PM_{2.5}}{AOD}$ )."'

In the Introduction, on line 38 to 40 – "A large community relies upon the spatial distribution of  $PM_{2.5}$  concentrations inferred from satellite AOD and a modelled  $PM_{2.5}$  to AOD relationship for health impact assessment and epidemiological analyses of long-term exposure"

In Methods, on line 76 to 78: "We collect ground-based measurements of  $PM_{2.5}$  for the year 2019 from which to produce observational constraints on  $\eta$  ( $\frac{PM_{2.5}}{AOD}$ ), the spatially and temporally varying ratio between 24-hour surface  $PM_{2.5}$  concentrations and AOD at satellite sampling time."

- Line 74: Taking into consideration the year-to-year variation of dust, why the year 2019 was focused in this study? Were there severe dust events? The motivation for the selection of a target year will be helpful for readers.

The regions of most interest for this study are the populous regions. We consider anthropogenic emissions a more important factor compared to natural dust. When the manuscript was in preparation, the year 2019 was the year with the most ground-based  $PM_{2.5}$  monitoring data and the most recent global-scale anthropogenic emission data. Despite the year-to-year variation of natural dust, the relative contribution to  $PM_{2.5}$  in populous regions is less variable.

We add to line 78 to 80 to explain: "At the time of manuscript preparation, the year 2019 offered the greatest density of measurements and the most current emission inventory."

- Line 132-139: The target year is 2019 in this study but did these emission datasets correspond to the year 2019? Or, was there a difference between the simulation year and the emission year? This point should be clarified, and if the latter, how about their impacts on modeling reproducibility?

Yes, the anthropogenic emissions are from CEDSV2 for the year 2019. This was the most recent year available as of March 2024, when the manuscript was submitted. The major natural emissions are fire and dust. We used GFED4 (van der Werf et al., 2017) and offline dust (Meng et al., 2021), both for the year 2019.

To clarify, we revised lines 144 to 146: “The primary emission data are from the Community Emissions Data System version 2 (CEDSV<sub>2</sub>; Hoesly et al., 2018; CEDS, 2024) for the year 2019.” and line 150 to 151 “Biomass burning emissions use the Global Fire Emissions Database, version 4 (GFED4) at daily resolution (van der Werf et al., 2017) for the year 2019.”

- Line 171-172: The sentence “P represents population density in each grid box” can be moved into Line 167-168 because these definitions used P.

We revised the manuscript accordingly.

- Line 169-177: The order of i, j, k, and S are confusing in the definitions of F and R. Why the order was different between them? If there is no specific reason, these orders should be unified through variables.

We revised the subscript order to make them consistent, following the order - i, j, k, s.

#### **technical corrections:**

- Line 255: Correct “coorelation” in this Fig. 2.

Thank you. Typo corrected.

## Reviewer 2:

Based on analysis of 2019 modeled PM<sub>2.5</sub> and AOD, the manuscript claims that global spatial variation in the PM<sub>2.5</sub> to AOD relationship is strongly influenced by aerosol composition. The study finds that the relationship is affected by aerosol composition and vertical profile. Although this seems to be an important thing, the manuscript has drawbacks in supporting the conclusions, which must be addressed before publication.

We appreciate the affirmation of the importance of this work and the valuable comments. The manuscript is revised to incorporate additional PM<sub>2.5</sub> ground measurements in the Global South, as well as measured PM<sub>2.5</sub> chemical composition from 3 networks. We updated the descriptions of our methods and included further discussion of the results. To address reviewer 2's major concern, an additional figure - Figure A2 - comparing GCHP simulated surface PM<sub>2.5</sub> chemical composition to ground measurements, is included in the Appendix. Figure 1, Figure 2, Figure A1, A4 to A6 and Table A1 are updated to reflect addition of PM<sub>2.5</sub> ground measurements. Please find our detailed response to each comment below.

1. Why the ratio of a modeled PM<sub>2.5</sub> to AOD is important? Model simulation of PM<sub>2.5</sub> is totally based on emissions, meteorological and the modeling algorithm, there is no necessary connection with AOD.

The simulated PM<sub>2.5</sub> and AOD relationship provides the opportunity to derive surface PM<sub>2.5</sub> using observationally based data (satellite observed total column AOD). The satellite-derived PM<sub>2.5</sub> can fill gaps in ground-based monitoring. Understanding and better simulating the PM<sub>2.5</sub> and AOD relationship will provide a better estimation of surface PM<sub>2.5</sub>, which is particularly important for regions with sparse ground-based PM<sub>2.5</sub> measurements. We revised lines 36 to 41 to emphasize the importance of this relationship:

“Satellite remote sensing of aerosol optical depth (AOD), an optical measure of aerosol abundance, offers information about the distribution of PM<sub>2.5</sub> (Kondragunta et al., 2022). A large community relies upon the spatial distribution of PM<sub>2.5</sub> concentrations inferred from satellite AOD and a modeled PM<sub>2.5</sub> to AOD relationship for health impact assessment and epidemiological analyses of long-term exposure (Brauer et al., 2024; Burnett et al., 2018; Cohen et al., 2017; Hao et al., 2023).”

2. GEOS-Chem settings are not detailed enough. What is the resolution? How are the emissions processed? How is the model performance against observations of chemical composition? We have no idea if the model results are good enough for following analysis with only validation of PM total mass.

The model resolution is elaborated in the first paragraph of section 2.4, lines 137-139:

“The simulation is conducted for the year 2019, on a C90 cubed-sphere grid corresponding to a horizontal resolution of about 100 km, with a spin-up time of 1 month.”

The emission information, including anthropogenic and natural are elaborated in the second paragraph in section 2.4, from line 143 to 151: “Emissions are processed with the Harmonized Emissions Component (HEMCO) (Lin et al., 2021). The primary emission data are from the Community Emissions Data System version 2 (CEDSV2; Hoesly et al., 2018; CEDS, 2024) for the year 2019. Emissions from stacks are distributed vertically (Bieser et al., 2011). Diel variation of anthropogenic emissions is included (Li et al., 2023). Resolution-dependent soil NO<sub>x</sub>, sea salt, biogenic VOC, and natural dust emissions are calculated offline at native meteorological resolution to produce consistent emissions across resolutions (Meng et al., 2021; Weng et al., 2020). Biomass burning emissions use the Global Fire Emissions Database, version 4 (GFED4) at daily resolution (van der Werf et al., 2017) for the year 2019.”

To evaluate the model’s performance in representing global scale PM<sub>2.5</sub> composition simulation and inform readers about the potential uncertainties in our analysis, we collected publicly available PM<sub>2.5</sub> compositional data from USEPA (306 sites), EU Environmental Protection Agency (37 sites), and the Surface PARTiculate mAtter Network (SPARTAN; 22 sites). We added a paragraph in section 2.1, lines 108-112, to clarify the source and coverage of PM<sub>2.5</sub> compositional data: “We also collected publicly available PM<sub>2.5</sub> compositional data to assess GCHP simulated composition. Long-term PM<sub>2.5</sub> compositional data are included from the United States Environmental Protection Agency’s Air Quality System, the European Environment Agency Air Quality e-Reporting system, and SPARTAN, with a total of 365 sites covering the U.S. (306), Europe (37), and the Global South (22).”

Our adjustment of 50% reduction in nitrate significantly mitigates the normalized mean bias (NMB) between simulated and ground measured nitrate, when compared an out-of-box simulation. Here are our results added to the Appendix: “

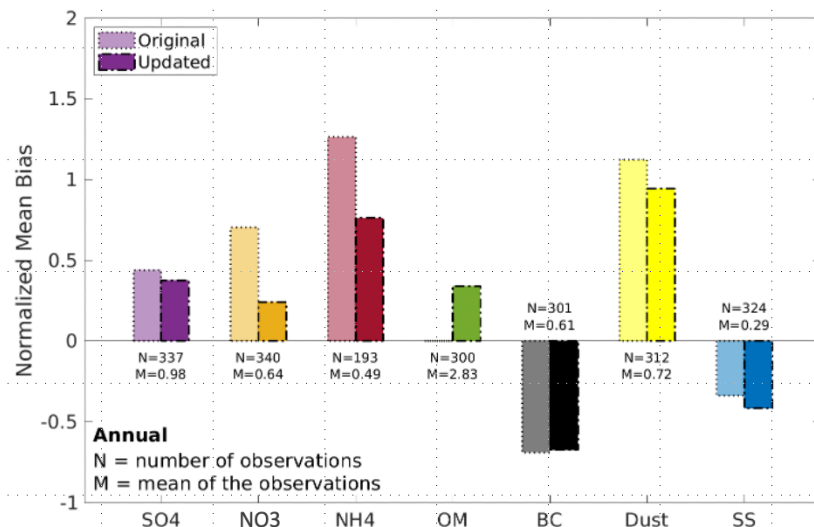

Figure A2. Normalized mean bias (NMB) between simulated PM<sub>2.5</sub> chemical composition and ground measurements from CSN, IMPROVE, EBAS, and SPARTAN. The original simulation is the out-of-box version of GCHP v13.4.0, the updated simulation includes adjustments such as GFED4.1s emission at daily scale, diel variation and vertical distribution of anthropogenic emissions, and 50% reduction in nitrate concentration.”

We therefore added the following to section 3.1, line 238-240: “Evaluation of the simulation of PM<sub>2.5</sub> chemical composition versus ground-based measurements reveals a high degree of consistency (Figure A2) that supports their further assessment of the factors affecting  $\eta$ .”

3. The study does not use all available observations. With very sparse observations sites in Africa, South American, it is quite challenging to obtain solid conclusions as claimed.

We found and added to our analysis 752 more PM<sub>2.5</sub> sites. This includes 58 more sites in South Asia, 96 more sites in the Middle East, and 3 more sites in Africa. We updated Figure 1, Figure 2, Figure A1, Figure A4-A6, Table A1, and the relevant texts to reflect this update.

4. The importance of chemical composition or vertical profile is simply depending on a sensitivity test to a global uniformed value. There is no logic here. It can't be claimed by just Figure 5 with a sensitivity test and global averages. I believe you can find other things important if you do a sensitivity test.

We clarify that the importance of chemical composition and vertical profile is determined by Figure 2, not Figure 5. Figure 2 examines other factors, such as boundary layer height, wind speed, and surface temperature. Based on these results, we narrow down to aerosol chemical composition and aerosol vertical profile for a more detailed analysis – the sensitivity tests in Figure 5. Although the sensitivity tests can certainly be done with more details (e.g., for certain regions and seasons), our goal is to address a global-scale study focusing on annual mean representation. The results are elaborated and explained in lines 254 to 264: “Figure 2 shows the spatial correlation of annual mean factors versus observation-based  $\eta$ . Aerosol components, particularly those with strong primary sources (dust, OM, and black carbon), exhibit the strongest correlations ( $>0.27$ ) with observationally based  $\eta$ . Significant positive correlations are found for mineral dust and black carbon, both of which are non- or weakly-hygroscopic. Significant negative correlations are found for organic matter and sea salt, reflecting a weak connection between surface concentrations and AOD aloft. Processes are further discussed in sections 3.2 and 3.4. The aerosol vertical profile exhibits a moderate correlation with  $\eta$  (0.14), which is notably higher than any meteorological factors ( $\leq 0.10$ ). Ground-based data from SPARTAN and AERONET corroborate the correlation between aerosol composition and  $\eta$  (Figure A7). We thus focus further analysis in Sections 3.2-3.4 on the two main drivers in  $\eta$ : aerosol composition and aerosol vertical profile.”

We also revised lines 22 to 25 for clarification: “The spatial correlation of observed  $\eta$  with meteorological fields, aerosol vertical profiles, and aerosol chemical composition reveals that the spatial variation of  $\eta$  is strongly influenced by aerosol composition and aerosol vertical profile.”

The connection between Figure 5 and Figure 2 is noted again in lines 322-323: “Figure 5 shows the global changes in the spatial variation in  $\eta$  due to variations in aerosol

chemical composition (top) and aerosol vertical profile (bottom), the two main drivers found in Figure 2.”

5. Vertical profile also influences the results a lot (8.4 compared to 12.3 of chemical composition), I think it is worth noting in the title.

Helpful suggestion. We revised the title to “Importance of Aerosol Composition and Aerosol Vertical Profile in Global Spatial Variation of the PM<sub>2.5</sub> to AOD Relationship”

## Reference

Benavente, N. R., Vara-Vela, A. L., Nascimento, J. P., Acuna, J. R., Damascena, A. S., de Fatima Andrade, M., and Yamasoe, M. A.: Air quality simulation with WRF-Chem over southeastern Brazil, part I: Model description and evaluation using ground-based and satellite data, *Urban Climate*, 52, 101703, <https://doi.org/10.1016/j.uclim.2023.101703>, 2023.

Bieser, J., Aulinger, A., Matthias, V., Quante, M., and Denier Van Der Gon, H. A. C.: Vertical emission profiles for Europe based on plume rise calculations, *Environmental Pollution*, 159, 2935–2946, <https://doi.org/10.1016/J.ENVPOL.2011.04.030>, 2011.

Brauer, M., Roth, G. A., Aravkin, A. Y., Zheng, P., Abate, K. H., Abate, Y. H., Abbafati, C., Abbasgholizadeh, R., Abbasi, M. A., Abbasian, M., Abbasifard, M., Abbasi-Kangevari, M., ElHafeez, S. A., Abd-Elsalam, S., Abdi, P., Abdollahi, M., Abdoun, M., Abdulah, D. M., Abdullahi, A., Abebe, M., Abedi, A., Abedi, A., Abegaz, T. M., Zuñiga, R. A. A., Abiodun, O., Abiso, T. L., Aboagye, R. G., Abolhassani, H., Abouzid, M., Aboye, G. B., Abreu, L. G., Abualruz, H., Abubakar, B., Abu-Gharbieh, E., Abukhadajah, H. J. J., Aburuz, S., Abu-Zaid, A., Adane, M. M., Addo, I. Y., Addolorato, G., Adedoyin, R. A., Adekanmbi, V., Aden, B., Adetunji, J. B., Adeyeoluwa, T. E., Adha, R., Adibi, A., Adnani, Q. E. S., Adzibbli, L. A., Afolabi, A. A., Afolabi, R. F., Afshin, A., Afyouni, S., Afzal, M. S., Afzal, S., Agampodi, S. B., Agbozo, F., Aghamiri, S., Agodi, A., Agrawal, A., Agyemang-Duah, W., Ahinkorah, B. O., Ahmad, A., Ahmad, D., Ahmad, F., Ahmad, N., Ahmad, S., Ahmad, T., Ahmed, A., Ahmed, A., Ahmed, A., Ahmed, L. A., Ahmed, M. B., Ahmed, S., Ahmed, S. A., Ajami, M., Akalu, G. T., Akara, E. M., Akbarialiabad, H., Akhlaghi, S., Akinosoglou, K., Akinyemiju, T., Akkaif, M. A., Akkala, S., Akombi-Inyang, B., Awaidy, S. A., Hasan, S. M. A., Alahdab, F., AL-Ahdal, T. M. A., Alalalmeh, S. O., Alalwan, T. A., Al-Aly, Z., Alam, K., Alam, N., Alanezi, F. M., Alanzi, T. M., Albakri, A., AlBataineh, M. T., Aldhaleei, W. A., et al.: Global burden and strength of evidence for 88 risk factors in 204 countries and 811 subnational locations, 1990–2021: a systematic analysis for the Global Burden of Disease Study 2021, *The Lancet*, 403, 2162–2203, [https://doi.org/10.1016/S0140-6736\(24\)00933-4](https://doi.org/10.1016/S0140-6736(24)00933-4), 2024.

Burnett, R., Chen, H., Szyszkowicz, M., Fann, N., Hubbell, B., Pope, C. A., Apte, J. S., Brauer, M., Cohen, A., Weichenthal, S., Coggins, J., Di, Q., Brunekreef, B., Frostad, J., Lim, S. S., Kan, H., Walker, K. D., Thurston, G. D., Hayes, R. B., Lim, C. C., Turner, M. C., Jerrett, M., Krewski, D., Gapstur, S. M., Diver, W. R., Ostro, B., Goldberg, D., Crouse, D. L., Martin, R. V., Peters, P., Pinault, L., Tjepkema, M., Van Donkelaar, A., Villeneuve, P. J., Miller, A. B., Yin, P., Zhou, M., Wang, L., Janssen, N. A. H., Marra, M., Atkinson, R. W., Tsang, H., Thach, T. Q., Cannon, J. B., Allen, R. T., Hart, J. E., Laden, F., Cesaroni, G., Forastiere, F., Weinmayr, G., Jaensch, A., Nagel, G., Concin, H., and Spadaro, J. V.: Global estimates of mortality associated



with longterm exposure to outdoor fine particulate matter, *Proceedings of the National Academy of Sciences of the United States of America*, 115, 9592–9597, <https://doi.org/10.1073/pnas.1803222115>, 2018.

Cohen, A. J., Brauer, M., Burnett, R., Anderson, H. R., Frostad, J., Estep, K., Balakrishnan, K., Brunekreef, B., Dandona, L., Dandona, R., Feigin, V., Freedman, G., Hubbell, B., Jobling, A., Kan, H., Knibbs, L., Liu, Y., Martin, R., Morawska, L., Pope, C. A., Shin, H., Straif, K., Shaddick, G., Thomas, M., van Dingenen, R., van Donkelaar, A., Vos, T., Murray, C. J. L., and Forouzanfar, M. H.: Estimates and 25-year trends of the global burden of disease attributable to ambient air pollution: an analysis of data from the Global Burden of Diseases Study 2015, *The Lancet*, 389, 1907–1918, [https://doi.org/10.1016/S0140-6736\(17\)30505-6](https://doi.org/10.1016/S0140-6736(17)30505-6), 2017.

Geng, G., Zhang, Q., Tong, D., Li, M., Zheng, Y., Wang, S., and He, K.: Chemical composition of ambient PM<sub>2.5</sub> over China and relationship to precursor emissions during 2005-2012, *Atmospheric Chemistry and Physics*, 17, 9187–9203, <https://doi.org/10.5194/acp-17-9187-2017>, 2017.

Hammer, M. S., Martin, R. V., Van Donkelaar, A., Buchard, V., Torres, O., Ridley, D. A., and Spurr, R. J. D.: Interpreting the ultraviolet aerosol index observed with the OMI satellite instrument to understand absorption by organic aerosols: Implications for atmospheric oxidation and direct radiative effects, *Atmospheric Chemistry and Physics*, 16, 2507–2523, <https://doi.org/10.5194/acp-16-2507-2016>, 2016.

Hao, H., Wang, Y., Zhu, Q., Zhang, H., Rosenberg, A., Schwartz, J., Amini, H., van Donkelaar, A., Martin, R., Liu, P., Weber, R., Russel, A., Yitshak-sade, M., Chang, H., and Shi, L.: National Cohort Study of Long-Term Exposure to PM<sub>2.5</sub> Components and Mortality in Medicare American Older Adults, *Environ. Sci. Technol.*, 57, 6835–6843, <https://doi.org/10.1021/acs.est.2c07064>, 2023.

Heald, C. L., Collett, J. L., Lee, T., Benedict, K. B., Schwandner, F. M., Li, Y., Clarisse, L., Hurtmans, D. R., Van Damme, M., Clerbaux, C., Coheur, P. F., Philip, S., Martin, R. V., and Pye, H. O. T.: Atmospheric ammonia and particulate inorganic nitrogen over the United States, *Atmospheric Chemistry and Physics*, 12, 10295–10312, <https://doi.org/10.5194/acp-12-10295-2012>, 2012.

Hoesly, R. M., Smith, S. J., Feng, L., Klimont, Z., Janssens-Maenhout, G., Pitkanen, T., Seibert, J. J., Vu, L., Andres, R. J., Bolt, R. M., Bond, T. C., Dawidowski, L., Kholod, N., Kurokawa, J. I., Li, M., Liu, L., Lu, Z., Moura, M. C. P., O'Rourke, P. R., and Zhang, Q.: Historical (1750-2014) anthropogenic emissions of reactive gases and aerosols from the Community Emissions Data System (CEDS), *Geoscientific Model Development*, 11, 369–408, <https://doi.org/10.5194/gmd-11-369-2018>, 2018.

Jin, X., Fiore, A. M., Curci, G., Lyapustin, A., Civerolo, K., Ku, M., Van Donkelaar, A., and Martin, R. V.: Assessing uncertainties of a geophysical approach to estimate surface fine particulate matter distributions from satellite-observed aerosol optical depth, *Atmospheric Chemistry and Physics*, 19, 295–313, <https://doi.org/10.5194/acp-19-295-2019>, 2019.

Kim, P. S., Jacob, D. J., Fisher, J. A., Travis, K., Yu, K., Zhu, L., Yantosca, R. M., Sulprizio, M. P., Jimenez, J. L., Campuzano-Jost, P., Froyd, K. D., Liao, J., Hair, J. W., Fenn, M. A., Butler, C. F., Wagner, N. L., Gordon, T. D., Welts, A., Wennberg, P. O., Crouse, J. D., St. Clair, J. M., Teng, A. P., Millet, D. B., Schwarz, J. P., Markovic, M. Z., and Perring, A. E.: Sources, seasonality, and trends of southeast US aerosol: An integrated analysis of surface, aircraft, and satellite observations with the GEOS-Chem chemical transport model, *Atmospheric Chemistry and Physics*, 15, 10411–10433, <https://doi.org/10.5194/acp-15-10411-2015>, 2015.

Kondragunta, S., Veihelmann, B., and Chatfield, R. J.: Monitoring Surface PM<sub>2.5</sub>: An International Constellation Approach to Enhancing the Role of Satellite Observations, <https://doi.org/10.25923/7SNZ-VN34>, 2022.

Kopke P., H. M. S. I. S. E. P.: Aerosol data set, Max Planck Institut fur Meteorologie, Report No. 243, Max-Planck-Institut Fur Meteorologie, Hamburg, <https://doi.org/Report No. 243>, 1997.

Latimer, R. N. C. and Martin, R. V.: Interpretation of measured aerosol mass scattering efficiency over North America using a chemical transport model, *Atmospheric Chemistry and Physics*, 19, 2635–2653, <https://doi.org/10.5194/acp-19-2635-2019>, 2019.

Li, Y., Martin, R. V., Li, C., Boys, B. L., van Donkelaar, A., Meng, J., and Pierce, J. R.: Development and evaluation of processes affecting simulation of diel fine particulate matter variation in the GEOS-Chem model, *Atmospheric Chemistry and Physics*, 23, 12525–12543, <https://doi.org/10.5194/ACP-23-12525-2023>, 2023.

Lin, H., Jacob, D. J., Lundgren, E. W., Sulprizio, M. P., Keller, C. A., Fritz, T. M., Eastham, S. D., Emmons, L. K., Campbell, P. C., Baker, B., Saylor, R. D., and Montuoro, R.: Harmonized Emissions Component (HEMCO) 3.0 as a versatile emissions component for atmospheric models: application in the GEOS-Chem, NASA GEOS, WRF-GC, CESM2, NOAA GEFS-Aerosol, and NOAA UFS models, *Geoscientific Model Development*, 14, 5487–5506, <https://doi.org/10.5194/gmd-14-5487-2021>, 2021.

Martin, R. V., Jacob, D. J., Yantosca, R. M., Chin, M., and Ginoux, P.: Global and regional decreases in tropospheric oxidants from photochemical effects of aerosols, *Journal of Geophysical Research: Atmospheres*, 108, <https://doi.org/10.1029/2002jd002622>, 2003.

McDuffie, E. E., Martin, R. V., Spadaro, J. V., Burnett, R., Smith, S. J., O'Rourke, P., Hammer, M. S., van Donkelaar, A., Bindle, L., Shah, V., Jaeglé, L., Luo, G., Yu, F., Adeniran, J. A., Lin, J., and Brauer, M.: Source sector and fuel contributions to ambient PM<sub>2.5</sub> and attributable mortality across multiple spatial scales, *Nature Communications*, 12, 1–12, <https://doi.org/10.1038/s41467-021-23853-y>, 2021.

Meng, J., Martin, R. V., Ginoux, P., Hammer, M., Sulprizio, M. P., Ridley, D. A., and Van Donkelaar, A.: Grid-independent high-resolution dust emissions (v1.0) for chemical transport models: Application to GEOS-Chem (12.5.0), *Geoscientific Model Development*, 14, 4249–4260, <https://doi.org/10.5194/gmd-14-4249-2021>, 2021.

Miao, R., Chen, Q., Zheng, Y., Cheng, X., Sun, Y., Palmer, P. I., Shrivastava, M., Guo, J., Zhang, Q., Liu, Y., Tan, Z., Ma, X., Chen, S., Zeng, L., Lu, K., and Zhang, Y.: Model bias in

simulating major chemical components of PM<sub>2.5</sub> in China, *Atmospheric Chemistry and Physics*, 20, 12265–12284, <https://doi.org/10.5194/acp-20-12265-2020>, 2020.

CEDS: <https://www.pnnl.gov/projects/ceds>, last access: 6 July 2024.

Philip, S., Martin, R. V., van Donkelaar, A., Lo, J. W.-H., Wang, Y., Chen, D., Zhang, L., Kasibhatla, P. S., Wang, S., Zhang, Q., Lu, Z., Streets, D. G., Bittman, S., and Macdonald, D. J.: Global Chemical Composition of Ambient Fine Particulate Matter for Exposure Assessment, *Environ. Sci. Technol.*, 48, 13060–13068, <https://doi.org/10.1021/es502965b>, 2014.

Prank, M., Sofiev, M., Tsyro, S., Hendriks, C., Semeena, V., Vazhappilly Francis, X., Butler, T., Denier van der Gon, H., Friedrich, R., Hendricks, J., Kong, X., Lawrence, M., Righi, M., Samaras, Z., Sausen, R., Kukkonen, J., and Sokhi, R.: Evaluation of the performance of four chemical transport models in predicting the aerosol chemical composition in Europe in 2005, *Atmospheric Chemistry and Physics*, 16, 6041–6070, <https://doi.org/10.5194/acp-16-6041-2016>, 2016.

Sha, T., Ma, X., Jia, H., Tian, R., Chang, Y., Cao, F., and Zhang, Y.: Aerosol chemical component: Simulations with WRF-Chem and comparison with observations in Nanjing, *Atmospheric Environment*, 218, 116982, <https://doi.org/10.1016/j.atmosenv.2019.116982>, 2019.

Shimadera, H., Hayami, H., Chatani, S., Morino, Y., Mori, Y., Morikawa, T., Yamaji, K., and Ohara, T.: Sensitivity analyses of factors influencing CMAQ performance for fine particulate nitrate, *Journal of the Air & Waste Management Association*, 64, 374–387, <https://doi.org/10.1080/10962247.2013.778919>, 2014.

Travis, K. R., Crawford, J. H., Chen, G., Jordan, C. E., Nault, B. A., Kim, H., Jimenez, J. L., Campuzano-Jost, P., Dibb, J. E., Woo, J. H., Kim, Y., Zhai, S., Wang, X., McDuffie, E. E., Luo, G., Yu, F., Kim, S., Simpson, I. J., Blake, D. R., Chang, L., and Kim, M. J.: Limitations in representation of physical processes prevent successful simulation of PM<sub>2.5</sub> during KORUS-AQ, *Atmospheric Chemistry and Physics*, 22, 7933–7958, <https://doi.org/10.5194/acp-22-7933-2022>, 2022.

Weagle, C. L., Snider, G., Li, C., Van Donkelaar, A., Philip, S., Bissonnette, P., Burke, J., Jackson, J., Latimer, R., Stone, E., Abboud, I., Akoshile, C., Anh, N. X., Brook, J. R., Cohen, A., Dong, J., Gibson, M. D., Griffith, D., He, K. B., Holben, B. N., Kahn, R., Keller, C. A., Kim, J. S., Lagrosas, N., Lestari, P., Khian, Y. L., Liu, Y., Marais, E. A., Martins, J. V., Misra, A., Muliane, U., Pratiwi, R., Quel, E. J., Salam, A., Segev, L., Tripathi, S. N., Wang, C., Zhang, Q., Brauer, M., Rudich, Y., and Martin, R. V.: Global Sources of Fine Particulate Matter: Interpretation of PM<sub>2.5</sub> Chemical Composition Observed by SPARTAN using a Global Chemical Transport Model, *Environmental Science and Technology*, 52, 11670–11681, <https://doi.org/10.1021/acs.est.8b01658>, 2018.

Weng, H., Lin, J., Martin, R., Millet, D. B., Jaeglé, L., Ridley, D., Keller, C., Li, C., Du, M., and Meng, J.: Global high-resolution emissions of soil NO<sub>x</sub>, sea salt aerosols, and biogenic volatile organic compounds, *Scientific Data*, 7, 1–15, <https://doi.org/10.1038/s41597-020-0488-5>, 2020.

van der Werf, G. R., Randerson, J. T., Giglio, L., Van Leeuwen, T. T., Chen, Y., Rogers, B. M., Mu, M., Van Marle, M. J. E., Morton, D. C., Collatz, G. J., Yokelson, R. J., and Kasibhatla, P. S.: Global fire emissions estimates during 1997-2016, *Earth System Science Data*, 9, 697–720, <https://doi.org/10.5194/essd-9-697-2017>, 2017.

Zhai, S., Jacob, D., Brewer, J., Li, K., Moch, J., Kim, J., Lee, S., Lim, H., Lee, H. C., Kuk, S. K., Park, R., Jeong, J., Wang, X., Liu, P., Luo, G., Yu, F., Meng, J., Martin, R., Travis, K., Hair, J., Anderson, B., Dibb, J., Jimenez, J., Campuzano-Jost, P., Nault, B., Woo, J.-H., Kim, Y., Zhang, Q., and Liao, H.: Interpretation of geostationary satellite aerosol optical depth (AOD) over East Asia in relation to fine particulate matter (PM<sub>2.5</sub>): insights from the KORUS-AQ aircraft campaign and seasonality, *Atmospheric Chemistry and Physics*, 1–23, <https://doi.org/10.5194/acp-2021-413>, 2021.

Zhang, L., Jacob, D. J., Knipping, E. M., Kumar, N., Munger, J. W., Carouge, C. C., Van Donkelaar, A., Wang, Y. X., and Chen, D.: Nitrogen deposition to the United States: Distribution, sources, and processes, *Atmospheric Chemistry and Physics*, 12, 4539–4554, <https://doi.org/10.5194/ACP-12-4539-2012>, 2012.

Zhang, L., Kok, J. F., Henze, D. K., Li, Q., and Zhao, C.: Improving simulations of fine dust surface concentrations over the western United States by optimizing the particle size distribution, *Geophysical Research Letters*, 40, 3270–3275, <https://doi.org/10.1002/grl.50591>, 2013.

Zhu, H., Martin, R. V., Croft, B., Zhai, S., Li, C., Bindle, L., Pierce, J. R., Chang, R. Y. W., Anderson, B. E., Ziemba, L. D., Hair, J. W., Ferrare, R. A., Hostetler, C. A., Singh, I., Chatterjee, D., Jimenez, J. L., Campuzano-Jost, P., Nault, B. A., Dibb, J. E., Schwarz, J. S., and Weinheimer, A.: Parameterization of size of organic and secondary inorganic aerosol for efficient representation of global aerosol optical properties, *Atmospheric Chemistry and Physics*, 23, 5023–5042, <https://doi.org/10.5194/ACP-23-5023-2023>, 2023.
